# Supplementary material for: Phosphorus and nitrogen co-doped reduced graphene oxide as superior electrode nanomaterials for supercapacitors
Source: Royal Society of Chemistry journal article supplement (doi:10.1039/d3ma00553d), 2023-01-01
Supplement: d3ma00553d1.pdf [file d3ma00553d1.pdf]

## Supporting information

### Phosphorus and Nitrogen Co-Doped Reduced Graphene Oxide as Superior Electrode Nanomaterials for Supercapacitors

*Khaled Rhili<sup>a</sup>, Siham Chergui<sup>a</sup>, Juan Carlos Abergo-Martinez<sup>a</sup>, Ahmad Samih El Douhaibi<sup>b</sup> and Mohamed Sijaj<sup>a\*</sup>*

<sup>a</sup> Department of Chemistry, University of Quebec at Montreal, Montreal QC, H3C3P8, Canada

<sup>b</sup> Department of Chemistry, Lebanese University, College of Science III, Campus Mont Michel, 1352, Tripoli, Lebanon

#### *Synthesis of reduced graphene oxide (rGO)*

Graphene oxide (GO) was synthesized following a modified Hummer's method, as reported by our group using natural graphite as raw material <sup>1-3-3</sup>. Reduced graphene oxide (rGO) was prepared by ultrasonication for 1h of the GO powder (100 mg) in deionised water (100 mL) to achieve a concentration of (1 mg mL<sup>-1</sup>). Then, the GO suspension was transferred to a 100 mL Teflon-lined autoclave and hydrothermally treated at 200 °C for

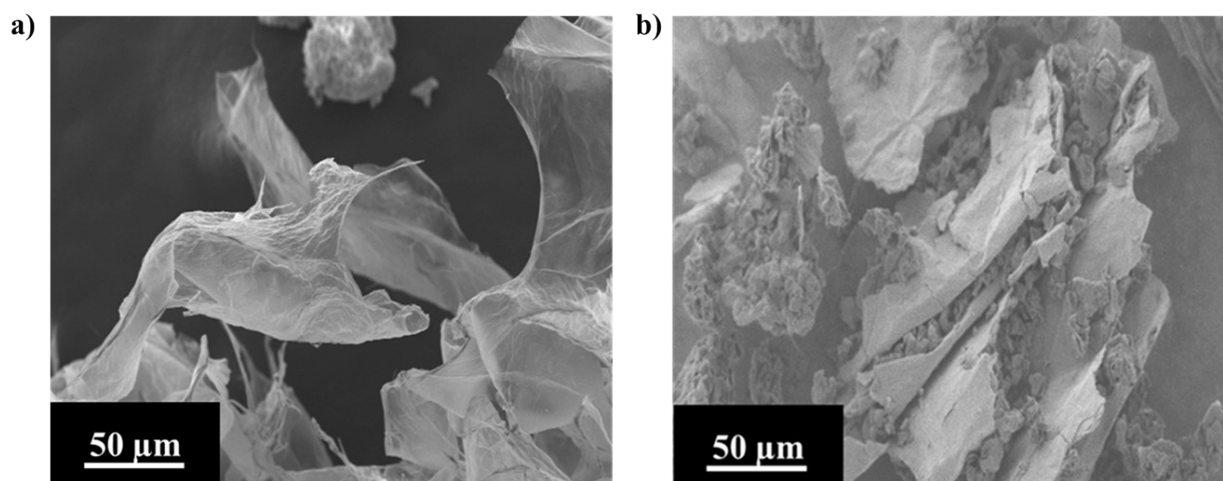

24 h. the obtained product was further pyrolyzing under the same annealing processes.

Figure S1. SEM images of (a) GO and (b) FGO.

Table S1: Element content of P, N-rGO measured from XPS analysis

| Sample | C (at.%) | O (at.%) | P (at.%) | N (at.%) |
|--------|----------|----------|----------|----------|
| PN-rGO | 81.2     | 12       | 2.3      | 4.5      |

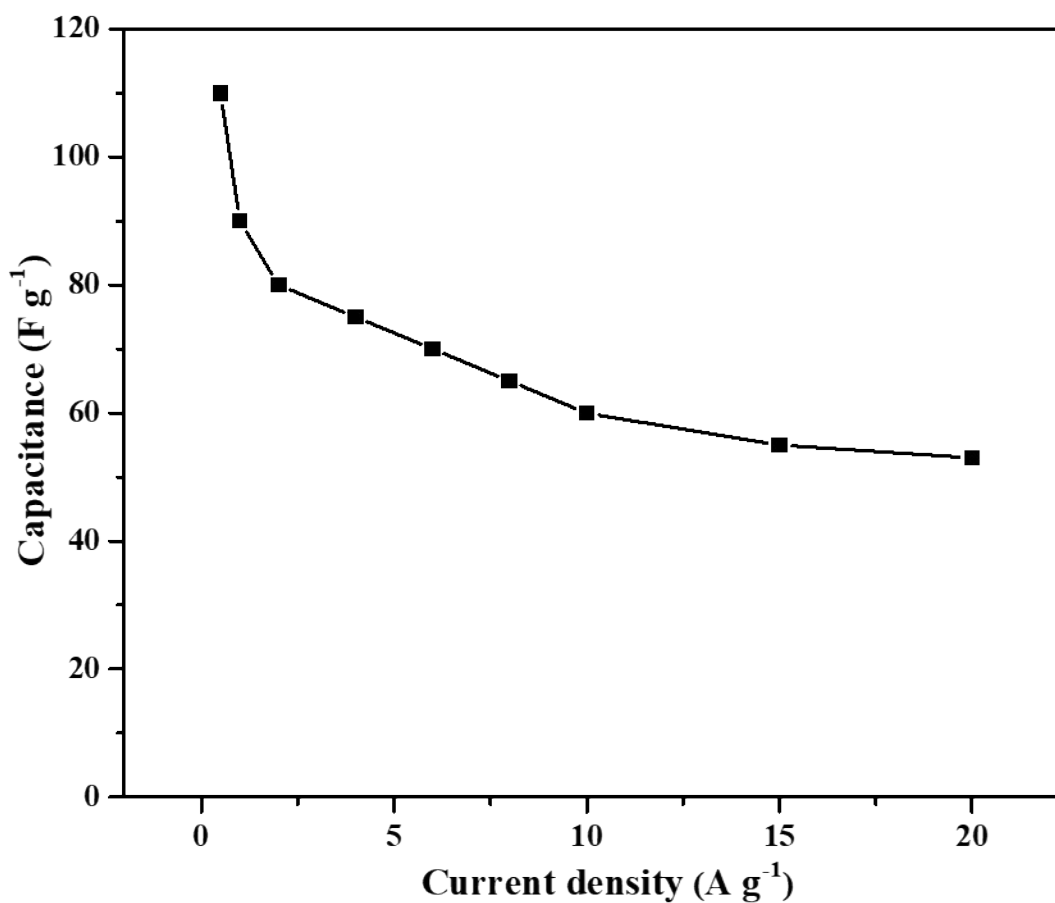

Figure S2. Specific capacitances of rGO at different current densities

## References

1. K. Rhili, S. Chergui, A. S. ElDouhaibi and M. Siaj, *ACS omega*, 2021, **6**, 6252-6260.
2. S. Chergui, K. Rhili, S. Poorahong and M. Siaj, *Membranes*, 2020, **10**, 229.
3. P. Brisebois, R. Izquierdo and M. Siaj, *Nanomaterials*, 2020, **10**, 1255.
